# Supplementary material
Source: PubMed Central journal article supplement (PMC1797942)

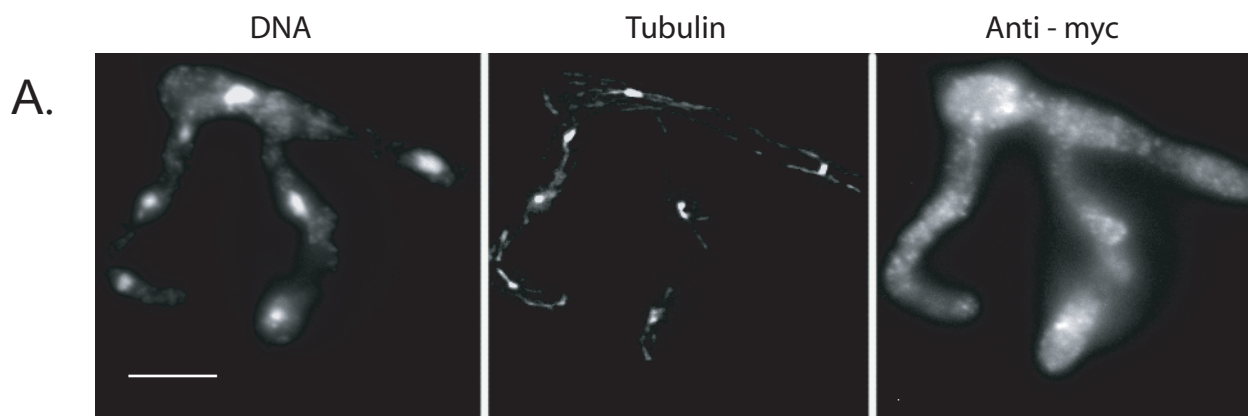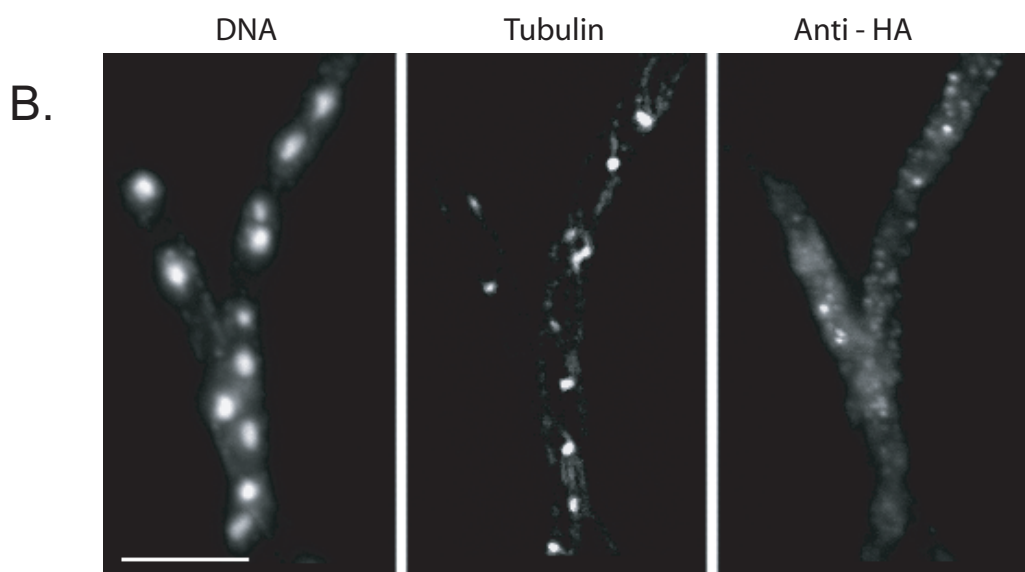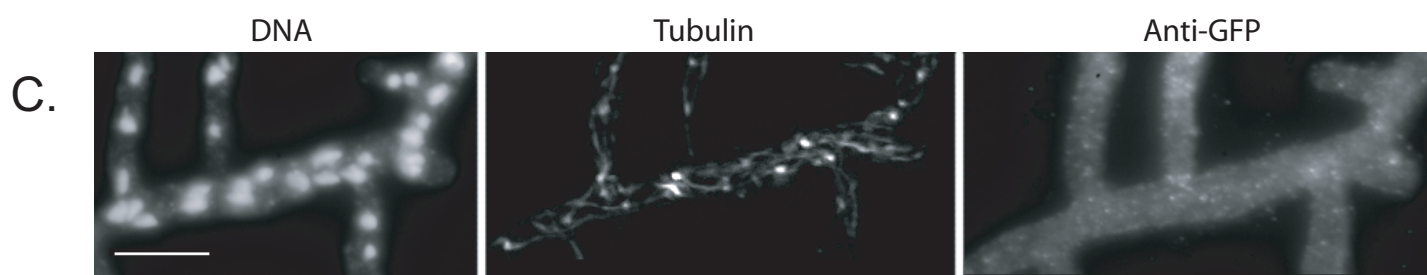

Supplement: eukcell_6_2_182__1.pdf [file eukcell_6_2_182__1.pdf]
